# Supplementary material
Source: MDPI journal article supplement (https://www.mdpi.com/2072-4292/13/13/2490)
Supplement: s1 [file s1]

# Supplementary Materials: Mapping Potential Plant Species Richness over Large Areas with Deep Learning, MODIS, and Species Distribution Models

Hyeyeong Choe Junhwa Chi and James H. Thorne

Table S1. Evaluation of the species distribution models using AUC and the Boyce index for 1574 plant species.

| Species                                                    | AUC 1 | Boyce 1 | AUC 2 | Boyce 2 | AUC 3 | Boyce 3 | AUC 4 | Boyce 4 | AUC 5 | Boyce 5 | mean AUC | mean Boyce |
|------------------------------------------------------------|-------|---------|-------|---------|-------|---------|-------|---------|-------|---------|----------|------------|
| <i>Abies holophylla</i> Maxim.                             | 0.789 | 0.855   | 0.808 | 0.927   | 0.871 | 0.716   | 0.796 | 0.831   | 0.807 | 0.9     | 0.814    | 0.846      |
| <i>Abutilon theophrasti</i> Medicus                        | 0.479 | 0.199   | 0.501 | 0.307   | 0.459 | −0.154  | 0.446 | −0.446  | 0.436 | 0.221   | 0.464    | 0.025      |
| <i>Acalypha australis</i> L.                               | 0.605 | 0.762   | 0.661 | 0.898   | 0.653 | 0.805   | 0.695 | 0.738   | 0.695 | 0.897   | 0.662    | 0.82       |
| <i>Acer barbinerve</i> Maxim.                              | 0.868 | 0.83    | 0.872 | 0.84    | 0.895 | 0.663   | 0.847 | 0.842   | 0.784 | 0.888   | 0.853    | 0.813      |
| <i>Acer buergerianum</i> Miq.                              | 0.773 | 0.739   | 0.814 | 0.863   | 0.605 | 0.587   | 0.759 | 0.904   | 0.791 | 0.878   | 0.748    | 0.794      |
| <i>Acer komarovii</i> Pojark.                              | 0.975 | 0.538   | 0.971 | 0.713   | 0.925 | 0.89    | 0.931 | 0.856   | 0.931 | 0.883   | 0.947    | 0.776      |
| <i>Acer mandshuricum</i> Maxim.                            | 0.874 | 0.772   | 0.903 | 0.921   | 0.955 | 0.773   | 0.873 | 0.8     | 0.878 | 0.842   | 0.896    | 0.822      |
| <i>Acer palmatum</i> Thunb. ex Murray                      | 0.77  | 0.805   | 0.816 | 0.878   | 0.779 | 0.946   | 0.778 | 0.876   | 0.767 | 0.908   | 0.782    | 0.883      |
| <i>Acer pictum</i> subsp. <i>mono</i> (Maxim.) Ohashi      | 0.743 | 0.897   | 0.791 | 0.929   | 0.767 | 0.905   | 0.757 | 0.617   | 0.774 | 0.915   | 0.766    | 0.853      |
| <i>Acer pictum</i> var. <i>truncatum</i> (Bunge) C.S.Chang | 0.783 | 0.92    | 0.756 | 0.507   | 0.809 | 0.782   | 0.746 | 0.263   | 0.745 | 0.636   | 0.768    | 0.622      |
| <i>Acer pseudo-sieboldianum</i> (Pax) Kom.                 | 0.796 | 0.96    | 0.794 | 0.94    | 0.79  | 0.978   | 0.789 | 0.961   | 0.752 | 0.813   | 0.784    | 0.93       |
| <i>Acer tataricum</i> subsp. <i>ginnala</i> (Maxim.) Wesm. | 0.726 | 0.958   | 0.797 | 0.958   | 0.711 | 0.91    | 0.762 | 0.926   | 0.761 | 0.961   | 0.751    | 0.943      |
| <i>Acer tegmentosum</i> Maxim.                             | 0.931 | 0.758   | 0.888 | 0.821   | 0.919 | 0.905   | 0.901 | 0.881   | 0.926 | 0.917   | 0.913    | 0.856      |
| <i>Acer triflorum</i> Kom.                                 | 0.842 | 0.764   | 0.813 | 0.732   | 0.782 | 0.278   | 0.827 | 0.657   | 0.872 | 0.872   | 0.827    | 0.661      |
| <i>Acer ukurunduense</i> Trautv. & C.A.Mey.                | 0.974 | 0.822   | 0.981 | 0.957   | 0.969 | 0.847   | 0.984 | 0.915   | 0.97  | 0.609   | 0.976    | 0.83       |
| <i>Achillea alpina</i> L.                                  | 0.781 | 0.916   | 0.652 | 0.824   | 0.785 | 0.859   | 0.805 | 0.68    | 0.663 | 0.706   | 0.737    | 0.797      |
| <i>Achillea millefolium</i> L.                             | 0.556 | 0.819   | 0.342 | −0.644  | 0.442 | −0.45   | 0.615 | 0.084   | 0.507 | 0.387   | 0.492    | 0.039      |
| <i>Achyranthes fauriei</i> H.Lev. & Vaniot                 | 0.981 | 0.833   | 0.963 | 0.812   | 0.96  | 0.798   | 0.971 | 0.856   | 0.987 | 0.76    | 0.972    | 0.812      |
| <i>Achyranthes japonica</i> (Miq.) Nakai                   | 0.702 | 0.794   | 0.79  | 0.816   | 0.709 | 0.792   | 0.736 | 0.916   | 0.752 | 0.895   | 0.738    | 0.843      |
| <i>Aconitum ciliare</i> DC.                                | 0.845 | 0.918   | 0.915 | 0.912   | 0.753 | 0.903   | 0.732 | 0.824   | 0.748 | 0.869   | 0.798    | 0.885      |
| <i>Aconitum coreanum</i> (H. Lev.) Rapaics                 | 0.84  | 0.858   | 0.877 | 0.936   | 0.85  | 0.917   | 0.838 | 0.961   | 0.899 | 0.744   | 0.861    | 0.883      |

|                                                                              |       |        |       |        |       |        |       |        |       |       |       |        |
|------------------------------------------------------------------------------|-------|--------|-------|--------|-------|--------|-------|--------|-------|-------|-------|--------|
| <i>Aconitum jaluense</i> Kom.                                                | 0.869 | 0.914  | 0.839 | 0.892  | 0.827 | 0.949  | 0.825 | 0.811  | 0.806 | 0.62  | 0.833 | 0.837  |
| <i>Aconitum kusnezoffii</i> Rchb.                                            | 0.737 | 0.836  | 0.696 | 0.764  | 0.73  | 0.568  | 0.786 | 0.703  | 0.864 | 0.945 | 0.762 | 0.763  |
| <i>Aconitum longecassidatum</i> Nakai                                        | 0.863 | 0.832  | 0.841 | 0.877  | 0.812 | 0.932  | 0.843 | 0.797  | 0.87  | 0.956 | 0.846 | 0.879  |
| <i>Aconitum pseudolaeve</i> Nakai                                            | 0.906 | 0.836  | 0.772 | 0.803  | 0.873 | 0.915  | 0.806 | 0.826  | 0.777 | 0.818 | 0.827 | 0.84   |
| <i>Aconogonon alpinum</i> (All.) Schur                                       | 0.819 | 0.525  | 0.853 | 0.535  | 0.812 | 0.726  | 0.748 | 0.817  | 0.77  | 0.721 | 0.8   | 0.665  |
| <i>Acorus calamus</i> L.                                                     | 0.633 | 0.536  | 0.712 | 0.563  | 0.277 | −0.309 | 0.298 | 0.641  | 0.507 | 0.124 | 0.485 | 0.311  |
| <i>Actaea asiatica</i> H.Hara                                                | 0.906 | 0.592  | 0.874 | 0.776  | 0.894 | 0.845  | 0.885 | 0.902  | 0.869 | 0.687 | 0.886 | 0.76   |
| <i>Actinidia arguta</i> var. <i>arguta</i> (Siebold & Zucc.) Planch. ex Miq. | 0.765 | 0.761  | 0.75  | 0.866  | 0.746 | 0.742  | 0.743 | 0.917  | 0.79  | 0.849 | 0.759 | 0.827  |
| <i>Actinidia kolomikta</i> (Maxim. & Rupr.) Maxim.                           | 0.735 | 0.828  | 0.852 | −0.044 | 0.816 | 0.76   | 0.873 | 0.81   | 0.861 | 0.858 | 0.827 | 0.642  |
| <i>Actinidia polygama</i> (Siebold & Zucc.) Planch. ex Maxim.                | 0.791 | 0.907  | 0.806 | 0.775  | 0.801 | 0.869  | 0.764 | 0.751  | 0.816 | 0.874 | 0.796 | 0.835  |
| <i>Adenocaulon himalaicum</i> Edgew.                                         | 0.885 | 0.853  | 0.858 | 0.764  | 0.873 | 0.743  | 0.897 | 0.839  | 0.871 | 0.911 | 0.877 | 0.822  |
| <i>Adenophora divaricata</i> Franch. & Sav.                                  | 0.802 | 0.601  | 0.835 | 0.904  | 0.767 | −0.048 | 0.782 | 0.923  | 0.826 | 0.883 | 0.802 | 0.653  |
| <i>Adenophora polyantha</i> Nakai                                            | 0.655 | 0.768  | 0.601 | 0.597  | 0.606 | 0.32   | 0.66  | 0.713  | 0.623 | 0.63  | 0.629 | 0.606  |
| <i>Adenophora remotiflora</i> (Siebold & Zucc.) Miq.                         | 0.929 | 0.443  | 0.863 | 0.909  | 0.861 | 0.843  | 0.883 | 0.783  | 0.733 | 0.74  | 0.854 | 0.744  |
| <i>Adenophora stricta</i> Miq.                                               | 0.813 | 0.814  | 0.775 | 0.779  | 0.869 | 0.513  | 0.874 | 0.836  | 0.83  | 0.733 | 0.832 | 0.735  |
| <i>Adenophora triphylla</i> var. <i>japonica</i> (Regel) H.Hara              | 0.721 | 0.852  | 0.763 | 0.911  | 0.789 | 0.937  | 0.663 | 0.861  | 0.77  | 0.911 | 0.741 | 0.894  |
| <i>Adenophora verticillata</i> var. <i>hirsuta</i> F.Schmidt                 | 0.438 | −0.334 | 0.752 | 0.671  | 0.453 | −0.162 | 0.551 | 0.007  | 0.557 | 0.201 | 0.551 | 0.077  |
| <i>Adenophora verticillata</i> var. <i>verticillata</i> (Pall.) Fisch.       | 0.69  | 0.543  | 0.573 | 0.206  | 0.703 | 0.325  | 0.63  | 0.652  | 0.659 | 0.721 | 0.651 | 0.489  |
| <i>Adonis amurensis</i> Regel & Radde                                        | 0.787 | 0.821  | 0.766 | 0.652  | 0.769 | 0.833  | 0.775 | 0.804  | 0.839 | 0.871 | 0.787 | 0.796  |
| <i>Adoxa moschatellina</i> L.                                                | 0.845 | 0.735  | 0.71  | 0.743  | 0.824 | 0.616  | 0.834 | 0.766  | 0.769 | 0.715 | 0.796 | 0.715  |
| <i>Aeginetia indica</i> L.                                                   | 0.982 | −0.325 | 0.989 | −0.203 | 0.992 | 0.331  | 0.986 | −0.329 | 0.982 | 0.001 | 0.986 | −0.105 |
| <i>Aeschynomene indica</i> L.                                                | 0.599 | 0.173  | 0.673 | 0.065  | 0.752 | 0.83   | 0.621 | 0.682  | 0.652 | 0.573 | 0.659 | 0.465  |
| <i>Agastache rugosa</i> (Fisch. & Mey.) Kuntze                               | 0.764 | 0.932  | 0.764 | 0.875  | 0.74  | 0.874  | 0.75  | 0.933  | 0.794 | 0.897 | 0.762 | 0.902  |
| <i>Agrimonia coreana</i> Nakai                                               | 0.716 | 0.866  | 0.827 | 0.438  | 0.749 | 0.821  | 0.823 | 0.874  | 0.827 | 0.82  | 0.789 | 0.764  |
| <i>Agrimonia pilosa</i> Ledeb.                                               | 0.725 | 0.964  | 0.736 | 0.928  | 0.691 | 0.891  | 0.729 | 0.967  | 0.738 | 0.937 | 0.724 | 0.937  |
| <i>Agropyron ciliare</i> (Trin.) Franch.                                     | 0.657 | 0.67   | 0.691 | 0.811  | 0.659 | 0.605  | 0.754 | 0.875  | 0.721 | 0.77  | 0.697 | 0.746  |

|                                                    |       |       |       |        |       |       |       |        |       |        |       |       |
|----------------------------------------------------|-------|-------|-------|--------|-------|-------|-------|--------|-------|--------|-------|-------|
| Agropyron tsukushiense var. transiens (Hack.) Ohwi | 0.658 | 0.805 | 0.643 | 0.919  | 0.654 | 0.582 | 0.709 | 0.681  | 0.696 | 0.711  | 0.672 | 0.74  |
| Agrostis clavata var. clavata Trin.                | 0.823 | 0.891 | 0.778 | 0.928  | 0.806 | 0.726 | 0.759 | 0.842  | 0.805 | 0.804  | 0.794 | 0.838 |
| Agrostis clavata var. nukabo Ohwi                  | 0.781 | 0.852 | 0.754 | 0.855  | 0.685 | 0.644 | 0.625 | 0.621  | 0.652 | 0.679  | 0.7   | 0.73  |
| Ailanthus altissima for. altissima (Mill.) Swingle | 0.712 | 0.722 | 0.692 | 0.567  | 0.673 | 0.779 | 0.654 | 0.606  | 0.683 | 0.71   | 0.683 | 0.677 |
| Ainsliaea acerifolia Sch.Bip.                      | 0.831 | 0.918 | 0.806 | 0.842  | 0.825 | 0.919 | 0.802 | 0.844  | 0.826 | 0.915  | 0.818 | 0.888 |
| Ainsliaea apiculata Sch.Bip.                       | 0.916 | 0.679 | 0.855 | 0.765  | 0.998 | 0.976 | 0.923 | 0.827  | 0.858 | 0.819  | 0.91  | 0.813 |
| Ajuga decumbens Thunb.                             | 0.942 | 0.855 | 0.883 | 0.686  | 0.88  | 0.87  | 0.874 | 0.513  | 0.817 | 0.591  | 0.879 | 0.703 |
| Ajuga multiflora Bunge                             | 0.776 | 0.769 | 0.63  | 0.544  | 0.811 | 0.718 | 0.675 | 0.615  | 0.717 | 0.719  | 0.722 | 0.673 |
| Ajuga spectabilis Nakai                            | 0.835 | 0.725 | 0.847 | 0.717  | 0.816 | 0.817 | 0.801 | 0.553  | 0.809 | 0.888  | 0.821 | 0.74  |
| Akebia quinata (Thunb.) Decne.                     | 0.718 | 0.883 | 0.749 | 0.892  | 0.73  | 0.942 | 0.824 | 0.971  | 0.764 | 0.96   | 0.757 | 0.93  |
| Alangium platanifolium var. trilobum (Miq.) Ohwi   | 0.768 | 0.759 | 0.807 | 0.916  | 0.777 | 0.921 | 0.805 | 0.924  | 0.763 | 0.92   | 0.784 | 0.888 |
| Albizia julibrissin Durazz.                        | 0.817 | 0.943 | 0.718 | 0.904  | 0.753 | 0.9   | 0.759 | 0.934  | 0.676 | 0.871  | 0.745 | 0.91  |
| Aletris spicata (Thunb.) Franch.                   | 0.991 | 0.838 | 0.99  | 0.911  | 0.997 | 0.805 | 0.991 | 0.833  | 0.99  | 0.857  | 0.992 | 0.849 |
| Allium macrostemon Bunge                           | 0.723 | 0.78  | 0.838 | 0.905  | 0.675 | 0.691 | 0.782 | 0.573  | 0.657 | 0.552  | 0.735 | 0.7   |
| Allium monanthum Maxim.                            | 0.795 | 0.658 | 0.759 | 0.759  | 0.709 | 0.061 | 0.729 | 0.777  | 0.78  | 0.877  | 0.754 | 0.626 |
| Allium sacculiferum Maxim.                         | 0.707 | 0.621 | 0.678 | 0.73   | 0.731 | 0.706 | 0.757 | 0.764  | 0.698 | 0.501  | 0.714 | 0.664 |
| Allium thunbergii G.Don                            | 0.708 | 0.585 | 0.805 | 0.934  | 0.755 | 0.828 | 0.706 | 0.738  | 0.755 | 0.921  | 0.746 | 0.801 |
| Allium tuberosum Rottler ex Spreng.                | 0.696 | 0.749 | 0.468 | −0.041 | 0.55  | 0.287 | 0.555 | 0.04   | 0.629 | 0.805  | 0.58  | 0.368 |
| Alnus firma Siebold & Zucc.                        | 0.808 | 0.741 | 0.841 | 0.914  | 0.878 | 0.846 | 0.857 | 0.883  | 0.848 | 0.93   | 0.846 | 0.863 |
| Alnus hirsuta Turcz. ex Rupr.                      | 0.75  | 0.956 | 0.691 | 0.88   | 0.753 | 0.91  | 0.721 | 0.851  | 0.782 | 0.945  | 0.739 | 0.908 |
| Alnus japonica (Thunb.) Steud.                     | 0.68  | 0.702 | 0.572 | 0.131  | 0.7   | 0.13  | 0.695 | 0.558  | 0.491 | −0.192 | 0.627 | 0.266 |
| Alopecurus aequalis Sobol.                         | 0.625 | 0.864 | 0.645 | 0.75   | 0.573 | 0.293 | 0.709 | 0.845  | 0.606 | 0.773  | 0.632 | 0.705 |
| Amaranthus lividus L.                              | 0.44  | −0.26 | 0.612 | 0.549  | 0.622 | 0.41  | 0.631 | 0.931  | 0.533 | 0.307  | 0.568 | 0.387 |
| Amaranthus mangostanus L.                          | 0.69  | 0.754 | 0.523 | 0.424  | 0.511 | 0.519 | 0.634 | −0.038 | 0.463 | 0.32   | 0.564 | 0.396 |
| Amaranthus patulus Bertol.                         | 0.757 | 0.794 | 0.742 | 0.854  | 0.71  | 0.729 | 0.703 | 0.725  | 0.735 | 0.909  | 0.73  | 0.802 |
